# Supplementary material for: Sex Differences in Mate Choice Preference Characteristics of Aequidens rivulatus
Source: MDPI journal article supplement (doi:10.3390/ani12091205), 2022-05-07
Supplement: s1 [file s1]

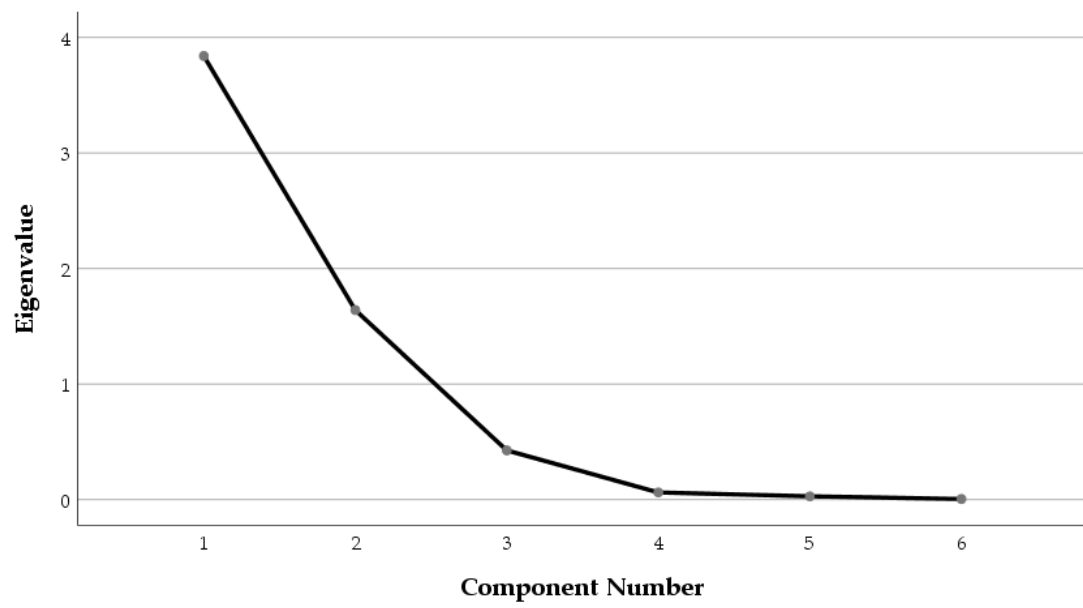

**Figure S1:** Scree plot of the preferred females of experiment 1.

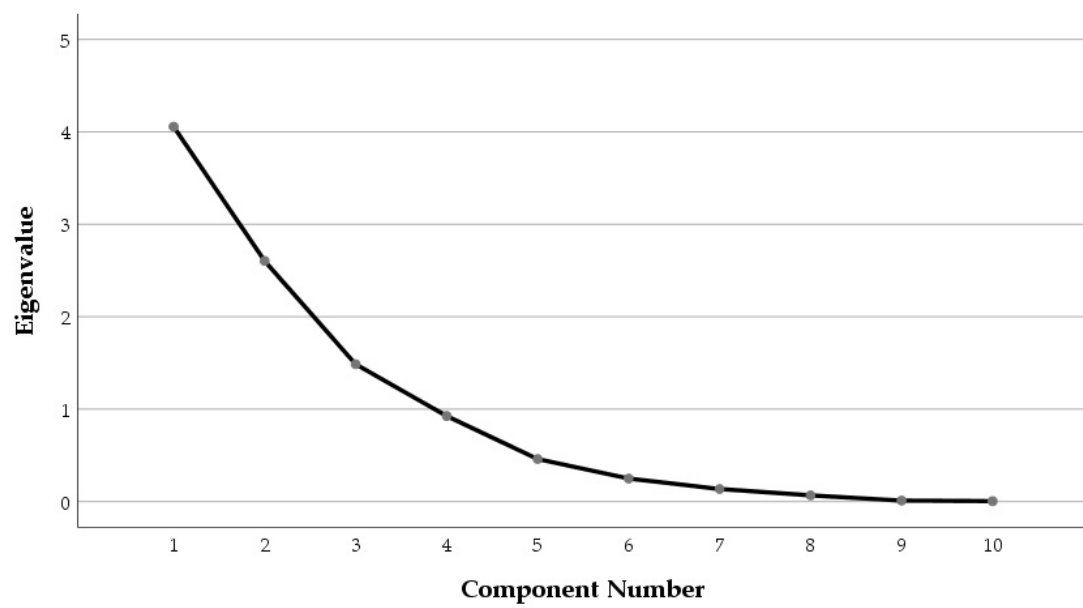

**Figure S2:** Scree plot of the main preference of males in experiment 1.

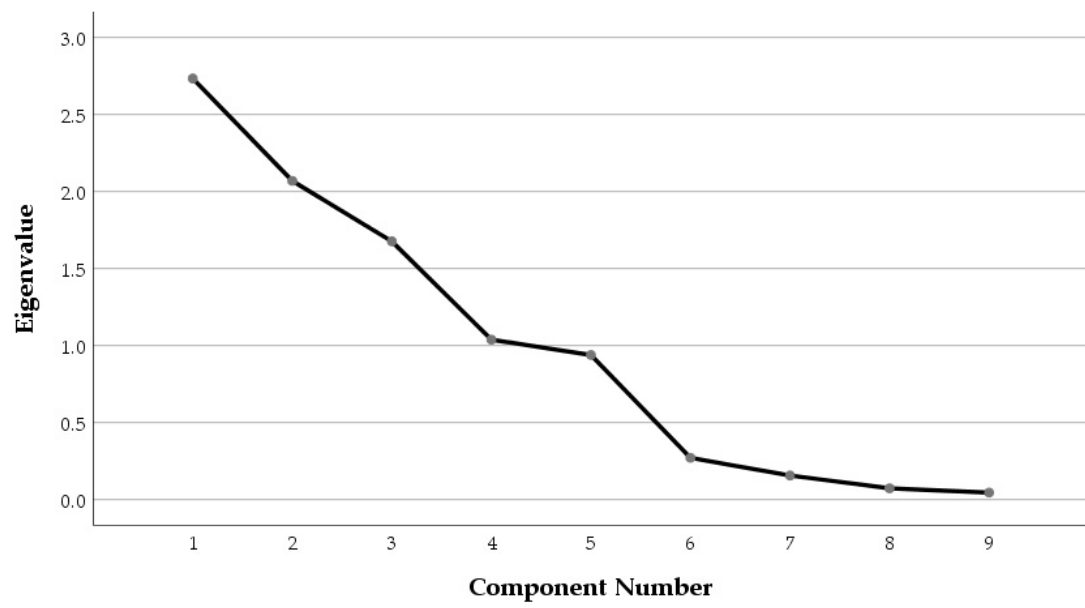

**Figure S3:** Scree plot of the preferred males of experiment 2.

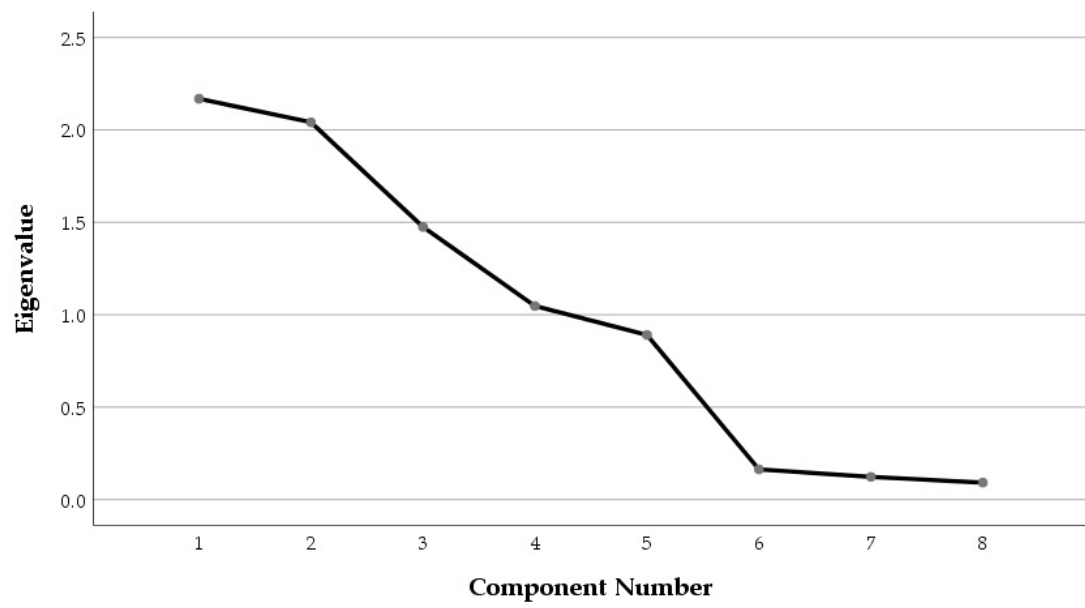

**Figure S4:** Scree plot of the non-preferred males of experiment 2.

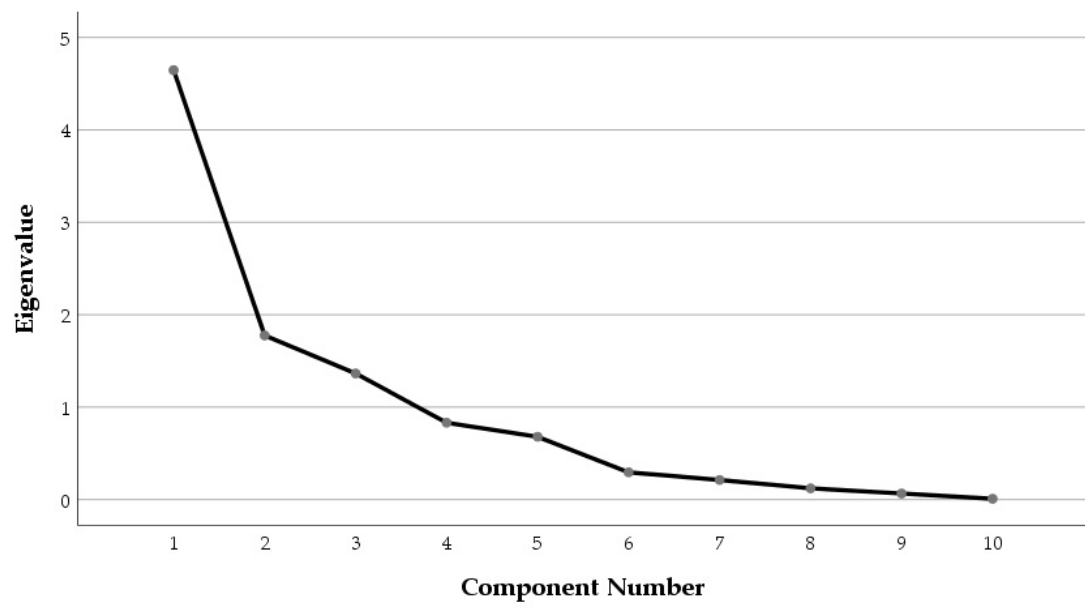

**Figure S5:** Scree plot of the main preference of females in experiment 2.
