# Supplementary material for: Sex Differences in Mate Choice Preference Characteristics of Aequidens rivulatus
Source: MDPI journal article supplement (doi:10.3390/ani12091205), 2022-05-07
Supplement: s1 [file s1]

**Table S1.** KMO and Bartlett's test of the preferred females of experiment 1.

|                                                  |                    |        |
|--------------------------------------------------|--------------------|--------|
| Kaiser-Meyer-Olkin Measure of Sampling Adequacy. |                    | 0.62   |
| Bartlett's Test of Sphericity                    | Approx. Chi-Square | 216.04 |
|                                                  | df                 | 15     |
|                                                  | Sig.               | 0.00   |

**Table S2.** KMO and Bartlett's test of the main preference of males in experiment 1.

|                                                  |                    |        |
|--------------------------------------------------|--------------------|--------|
| Kaiser-Meyer-Olkin Measure of Sampling Adequacy. |                    | 0.56   |
| Bartlett's Test of Sphericity                    | Approx. Chi-Square | 605.72 |
|                                                  | df                 | 45     |
|                                                  | Sig.               | 0.00   |

**Table S3.** KMO and Bartlett's test of the preferred males of experiment 2.

|                                                  |                    |        |
|--------------------------------------------------|--------------------|--------|
| Kaiser-Meyer-Olkin Measure of Sampling Adequacy. |                    | 0.55   |
| Bartlett's Test of Sphericity                    | Approx. Chi-Square | 143.49 |
|                                                  | df                 | 36     |
|                                                  | Sig.               | 0.00   |

**Table S4.** KMO and Bartlett's test of the non-preferred males of experiment 2.

|                                                  |                    |       |
|--------------------------------------------------|--------------------|-------|
| Kaiser-Meyer-Olkin Measure of Sampling Adequacy. |                    | 0.50  |
| Bartlett's Test of Sphericity                    | Approx. Chi-Square | 69.94 |
|                                                  | df                 | 21    |
|                                                  | Sig.               | 0.00  |

**Table S5.** KMO and Bartlett's test of the main preference of females in experiment 2.

|                                                  |                    |        |
|--------------------------------------------------|--------------------|--------|
| Kaiser-Meyer-Olkin Measure of Sampling Adequacy. |                    | 0.60   |
| Bartlett's Test of Sphericity                    | Approx. Chi-Square | 197.33 |
|                                                  | df                 | 45     |
|                                                  | Sig.               | 0.00   |
